# Supplementary material
Source: bioRxiv or medRxiv preprint supplement (https://www.biorxiv.org/highwire/filestream/86441/field_highwire_adjunct_files/0/090795-1.pdf)
Supplement: Supplementary file [file 090795-1.pdf]

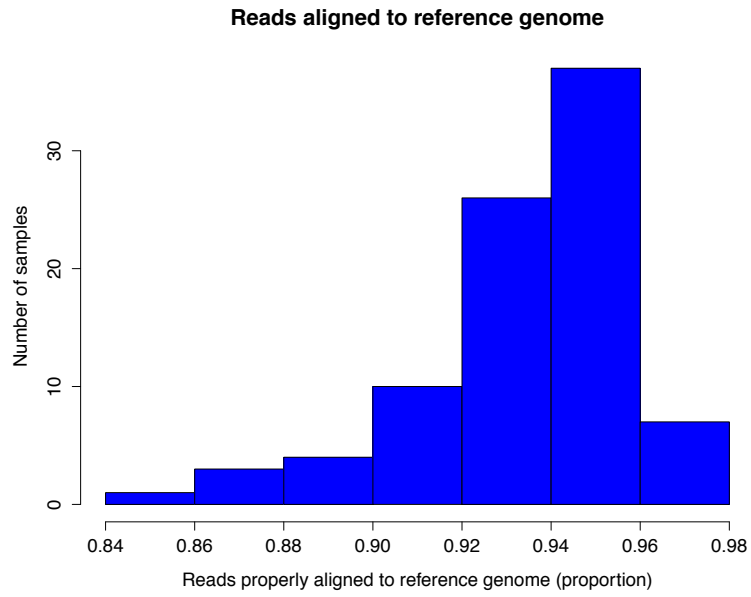

S1 Fig. Histogram of the proportion of reads passing quality filter that aligned to the references genome.
